# Supplementary material
Source: publisher site journal article supplement (https://www.dovepress.com/article/380651)
Supplement: Supplementary file 1 [file get_supplementary_file.php]

**Table S1** Different MRI scanner manufacturers

| Characteristics | Magnetic Field Strength | Manufacturer Details | Patient Count |
| --- | --- | --- | --- |
| Magnetic Field Strength | 1.5 T | Optima MR450w, GE Healthcare, Little Chalfont, UK | 98  (10.63%) |
| Signa HDx, GE Healthcare, Little Chalfont, UK | 53  (5.75%) |
| Signa HDxt, GE Healthcare, Little Chalfont, UK | 138 (14.97%) |
| Avanto, Siemens, Munich, Germany | 179 (19.41%) |
| 3 T | Signa Excite, GE Healthcare, Little Chalfont, UK | 10 (1.08%) |
| Signa HDx, GE Healthcare, Little Chalfont, UK | 219 (23.75%) |
| Signa HDxt, GE Healthcare, Little Chalfont, UK | 110 (11.93%) |
| Skyra, Siemens Healthcare, Little Chalfont, UK | 57  (6.18%) |
| Trio, Siemens, Munich, Germany | 1  (0.11%) |
| Trio Tim, Siemens, Munich, Germany | 57  (6.18%) |

**Table S2** MRI scan protocols

| MRI Acquisition Parameters | Value Details | Values |
| --- | --- | --- |
| Slice Thickness (mm) | Range | 1.04 – 2.5 |
| Median | 2 |
| Repetition Time (ms) | Range | 3.54-7.39 |
| Median | 5.2 |
| Echo Time (ms) | Range | 1.25-2.76 |
| Median | 2.39 |
| Acquisition Matrix | Minimum Array Size | 320 × 320 |
| Maximum Array Size | 448 × 448 |
| Flip Angle (degrees) | Range | 7-12 |
| Median | 10 |
| FOV(mm) | Range | 250-480 |
| Median | 350 |
